# Supplementary material for: Urchin-like NiCo2O4 hollow microspheres with oxygen vacancies synthesized by self-template for supercapacitor
Source: Royal Society of Chemistry journal article supplement (doi:10.1039/d1nj04153c), 2021-01-01
Supplement: d1nj04153c1.pdf [file d1nj04153c1.pdf]

# Supplementary Information

## Urchin-like NiCo<sub>2</sub>O<sub>4</sub> hollow microspheres with oxygen vacancies synthesized by self-template for supercapacitors

Zhongwei Luo<sup>a</sup>, Dong Shu<sup>a,b,c</sup>, Fenyun Yi<sup>a,b,c</sup>, Jingzhou Ling<sup>a</sup>, Mengyi Wang<sup>a</sup>,

Chen Huang<sup>a</sup>, Aimei Gao<sup>\*a,b,c</sup>

<sup>a</sup>. School of Chemistry, South China Normal University, Guangzhou, 510006, PR China

<sup>b</sup>. Experimental Teaching Demonstration Center of New Energy Materials and Devices, Guangzhou, 510006, PR China

<sup>c</sup>. Engineering Research Center of Materials and Technology for Electrochemical Energy Storage (Ministry of Education)

\* Corresponding author E-mail: gaoam@scnu.edu.cn.

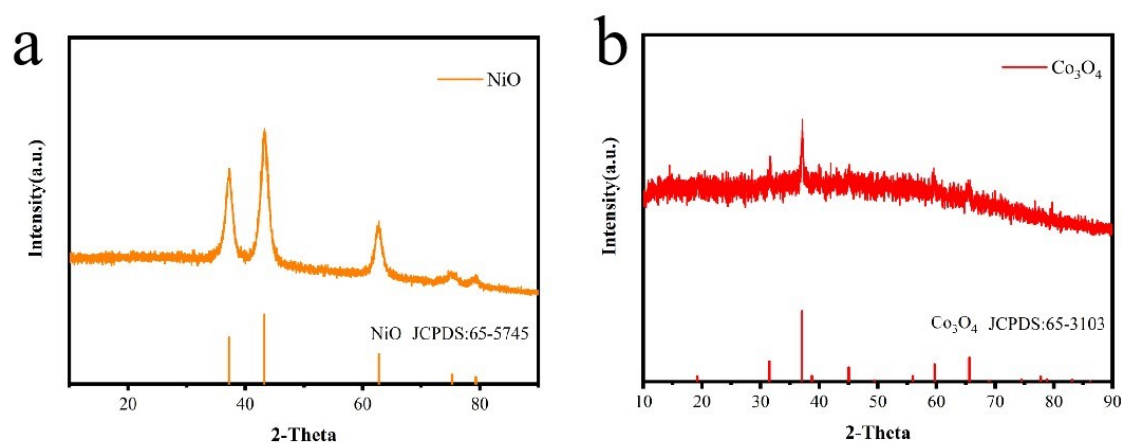

Figure S1. XRD curves of NiO (a) and Co<sub>3</sub>O<sub>4</sub> (b).

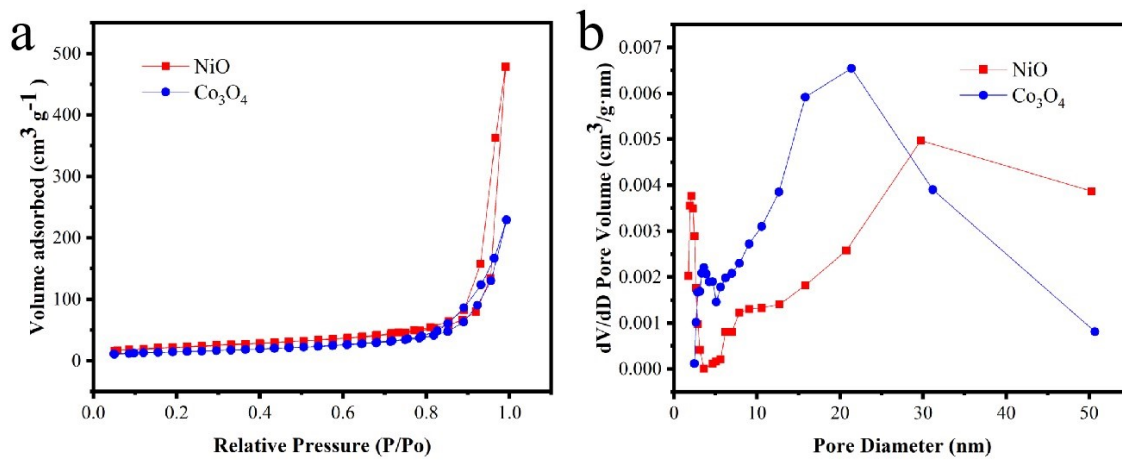

**Figure S2.** (a) N<sub>2</sub> adsorption /desorption curves and (b) pore size distribution curves of NiO and Co<sub>3</sub>O<sub>4</sub>.

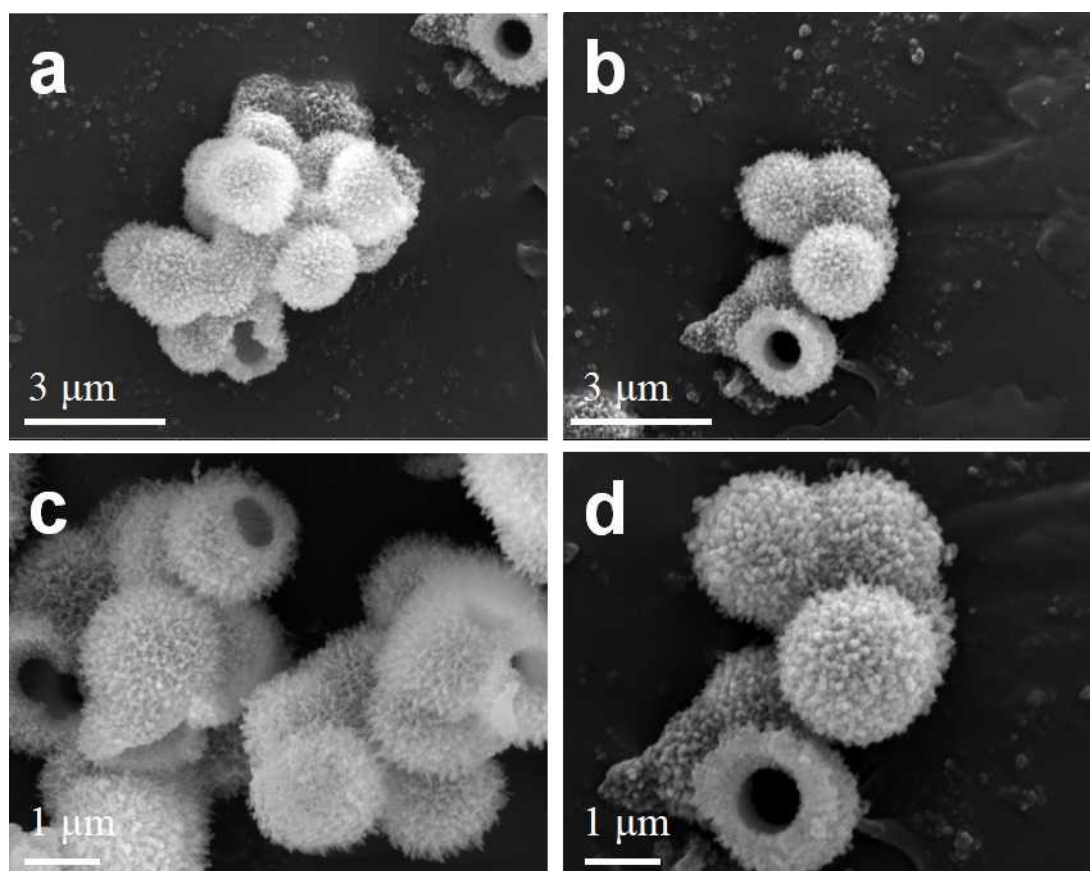

**Figure S3.** SEM image of NiO (a,c) and Co<sub>3</sub>O<sub>4</sub> (b,d).

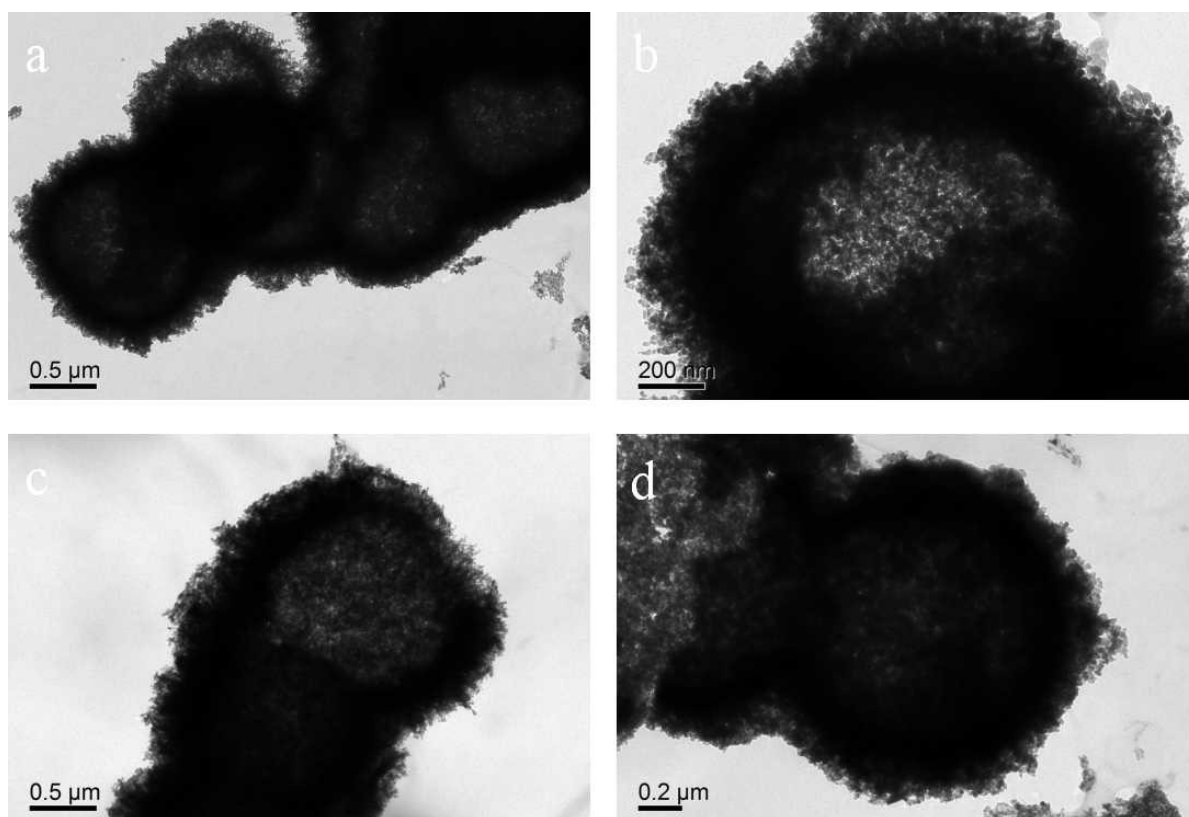

**Figure S4.** TEM image of NiO (a-b) and Co<sub>3</sub>O<sub>4</sub> (c-d).

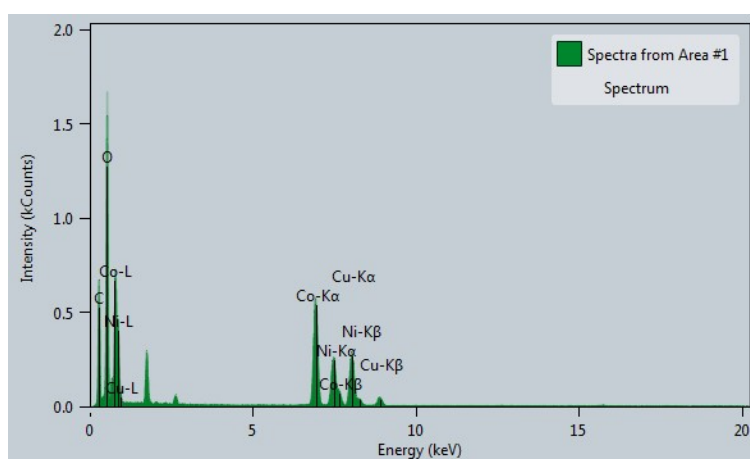

**Figure S5.** Energy dispersive X-Ray (EDX) spectrum of H-NiCo<sub>2</sub>O<sub>4</sub>.

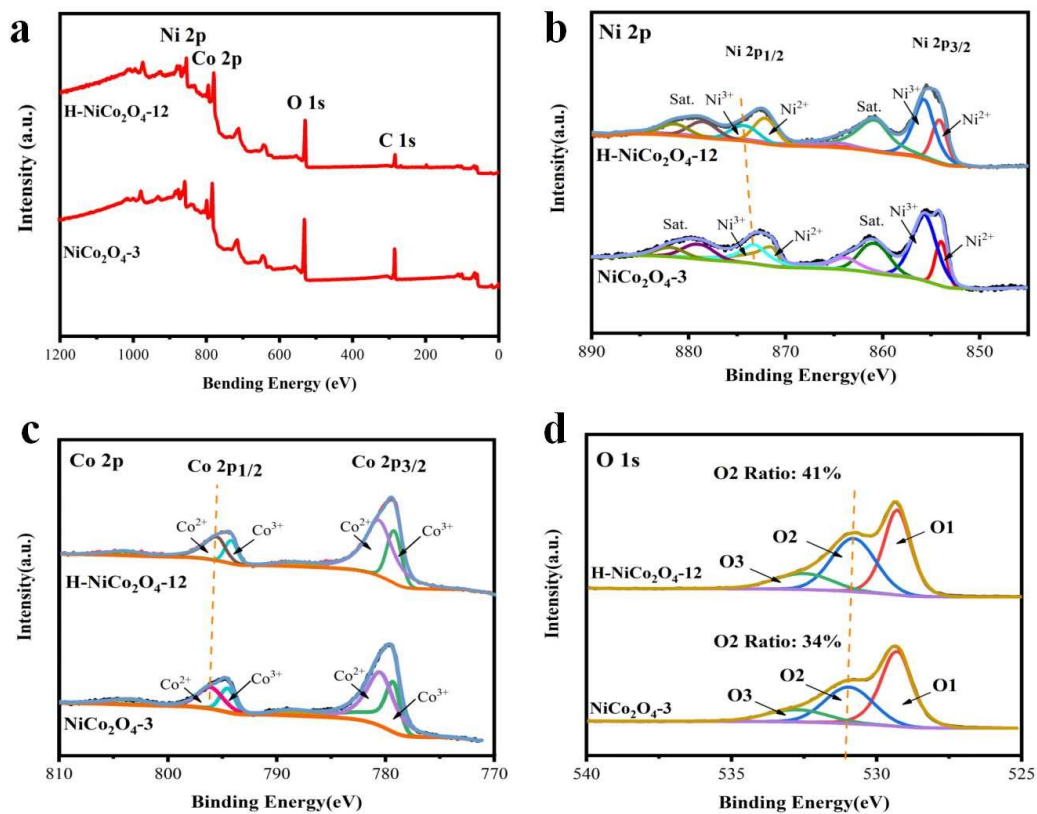

**Figure S6.** XPS full spectrum (a), high-resolution Ni 2p (b), Co 2p (c) and O 1s (d) of H-NiCo<sub>2</sub>O<sub>4</sub>-12 and NiCo<sub>2</sub>O<sub>4</sub>-3.

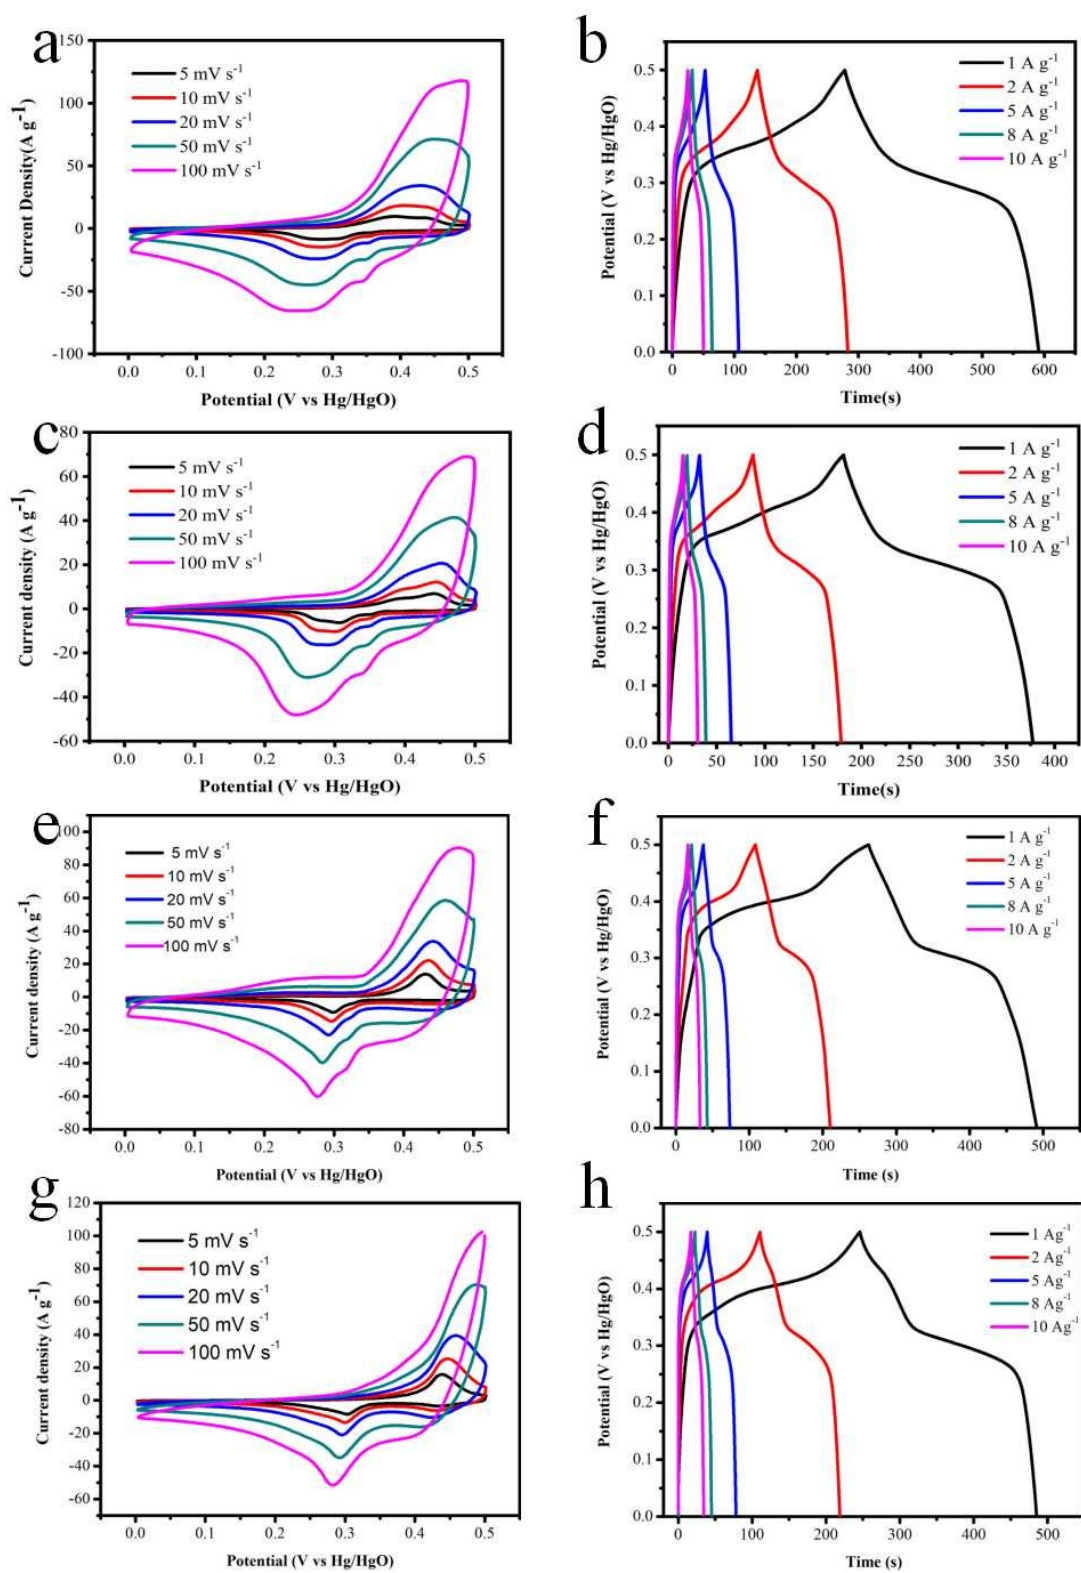

**Figure S7.** CV curves at various scan rates and GCD curves under different current densities of NiCo<sub>2</sub>O<sub>4</sub>-3 (a, b), NiCo<sub>2</sub>O<sub>4</sub>-1(c, d), NiO (e, f) and Co<sub>3</sub>O<sub>4</sub> (g, h), respectively.

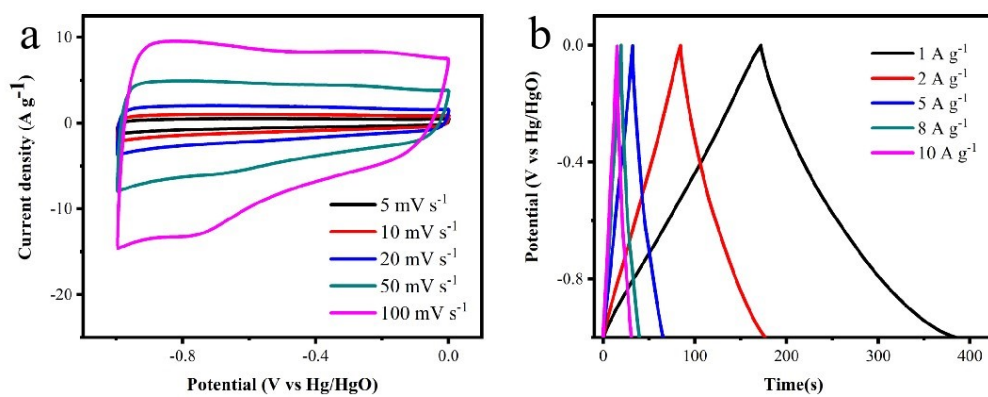

**Figure S8.** (a) CV curves at various scan rates and (b) GCD curves under different current densities of activated carbon.

**Table S1** Comparison of specific capacitance between H-NiCo<sub>2</sub>O<sub>4</sub> and reported NiCo<sub>2</sub>O<sub>4</sub>-based electrodes.

| Sample                                              | Specific capacitance                             | Rate Capability                    | Cycle Stability  | Ref.      |
|-----------------------------------------------------|--------------------------------------------------|------------------------------------|------------------|-----------|
| NiCo <sub>2</sub> O <sub>4</sub> nanoflowers        | 702 F g <sup>-1</sup> (5mV s <sup>-1</sup> )     | -----                              | 94.2% (5000 C)   | 1         |
| YS-NiCo <sub>2</sub> O <sub>4</sub>                 | 835.7 F g <sup>-1</sup> (0.5 A g <sup>-1</sup> ) | 64 % (1 to 20 A g <sup>-1</sup> )  | 70.5 % (10000 C) | 2         |
| NiCo <sub>2</sub> O <sub>4</sub> @ CNFs             | 540 F g <sup>-1</sup> (1A g <sup>-1</sup> )      | 46 % (1 to 7 A g <sup>-1</sup> )   | 93.1 % (6000 C)  | 3         |
| PNCO@FSSM                                           | 530 F g <sup>-1</sup> (6 mA cm <sup>-2</sup> )   | -----                              | 90.5 % (3000 C)  | 4         |
| 3D rGN/NiCo <sub>2</sub> O <sub>4</sub>             | 708.36 F g <sup>-1</sup> (1A g <sup>-1</sup> )   | 82% (1 to 16 A g <sup>-1</sup> )   | 94.3 % (6000 C)  | 5         |
| honeycomb-like NiCo <sub>2</sub> O <sub>4</sub> @NF | 646.6 F g <sup>-1</sup> (1A g <sup>-1</sup> )    | 68% (1 to 9 A g <sup>-1</sup> )    | 96.5% (3000 C)   | 6         |
| NiCo <sub>2</sub> O <sub>4</sub>                    | 725.7 F g <sup>-1</sup> (1A g <sup>-1</sup> )    | 48.5% (1 to 10 A g <sup>-1</sup> ) | 70 % (5000 C)    | 7         |
| H-NiCo <sub>2</sub> O <sub>4</sub>                  | 862 F g <sup>-1</sup> (1A g <sup>-1</sup> )      | 74.2% (1 to 10 A g <sup>-1</sup> ) | 80% (5000 C)     | This work |

## References

1. R. B. Waghmode, N. C. Maile, D. S. Lee and A. P. Torane, *Electrochim. Acta*, 2020, **350**, 136413.
2. L. Wang, X. Y. Jiao, P. Liu, Y. Ouyang, X. F. Xia, W. Lei and Q. L. Hao, *Appl. Surf. Sci.*, 2018, **427**, 174-181.
3. M. H. El-Shafei, A. G. El-Deen and A. Abd El-Moneim, *J Mater Sci: Mater Electron*, 2021, **32**, 15882–15897.

4. G.P. Kamble, A.S. Rasal, S.A. Mane, R.A. Chavan, J.-Y. Chang, Y.-C. Ling, S.S. Kolekar and A.V. Ghule, *RSC Adv.*, 2021, **11**, 3666-3672.
5. Y. Zhou, H. J. Liao, J. Li, H. X. Wang and Y. Wang, *Appl. Surf. Sci.*, 2021, **534**, 147598.
6. D. R. Kumar, K. R. Prakasha, A. S. Prakash and J. J. Shim, *J. Alloys Compd.*, 2020, **836**, 155370.
7. Q. Y. Wang, J. Y. Zhao, C. Zhang, X. Luo, J. Shao, M. Zhong, Z. H. Ye, P. D. Feng, X. L. Liu, K. Li and W. W. Zhao, *J. Alloys Compd.*, 2021, **852**, 156613.
